# Supplementary material for: EXAFS and DFT: Evidence for the [TcO]2+ core
Source: Royal Society of Chemistry journal article supplement (doi:10.1039/b913558h), 2009-01-01
Supplement: b913558h.pdf [file b913558h.pdf]

## Electronic Supplementary information

### Exafs and DFT : Evidence for the [Tc=O]<sup>2+</sup> core

Eric Breynaert,<sup>\*a</sup> Christine E.A Kirschock<sup>a</sup> and André Maes<sup>a</sup>  
DOI: 10.1039/b000000x

#### S1: overview of the EXAFS data analysis and modelling algorithm

Data reduction and analysis were achieved using a combination of XAS and modelling tools including EXAFSPAK, IFEFFIT, FEFF8, Gaussian03<sup>1</sup> (Fig. S1). The raw data for each sample was first recalibrated and different scans were averaged using the mcalib and mave tools from the exafspak suite of programs.<sup>2</sup> The resulting data were imported into ATHENA for data reduction purposes such as background subtraction using the autobk algorithm and normalization of the edge jump. Fitting the normalized EXAFS signal was performed in the IFEFFIT fitting module ARTEMIS.<sup>3</sup> All fitting was done in k-space using an overall scaling factor  $S_0$ <sup>2</sup> fixed at 1.

#### XAS data analysis

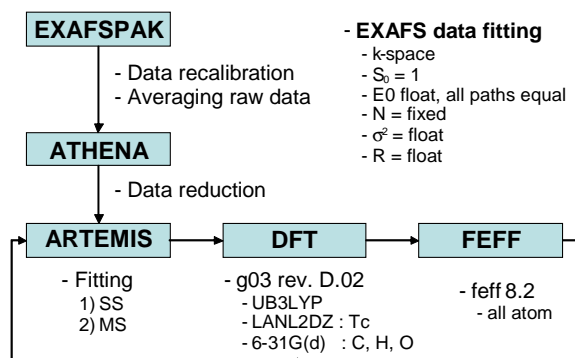

Fig. S1 Schematic representation of EXAFS data analysis and modelling algorithm

#### S2 phase- and amplitude-corrected Fourier transformation of the $k^3$ weighted exafs spectrum

In case of the octahedral coordination of Tc in the  $\text{Tc}(\text{acac})_3^0$  complex, the symmetric first shell of oxygen atoms would result in one single peak with a symmetrical imaginary part after phase and amplitude corrected Fourier transformation of the EXAFS signal. This symmetrical single peak would have its maximum at the top of the absolute magnitude and at the correct coordination distance.<sup>4</sup> The presence of two maxima in the imaginary part under the nearest neighbor signal in the RDF (Fig. S2) after phase- and amplitude-corrected FT of the  $k^3$  weighted EXAFS spectrum was interpreted as an indication for the presence of a second species

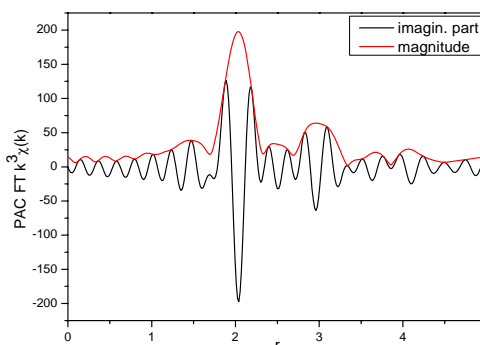

Fig. S2 phase- and amplitude-corrected Fourier transformation of the  $k^3$  weighted exafs spectrum

#### S3: exafs data and $\text{Tc}(\text{acac})_3^0$ signal reconstructed with the parameters in Table 1.

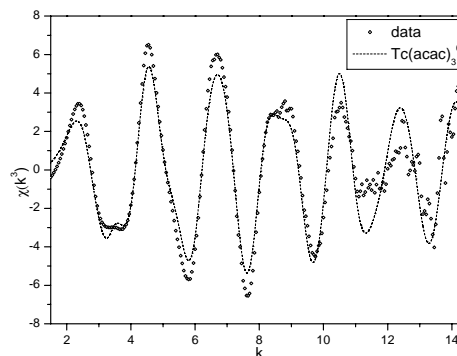

Fig. S3: exafs data and  $\text{Tc}(\text{acac})_3^0$  signal reconstructed with the parameters in Table 1.

#### S4 Feff8 input files for the $\text{Tc}(\text{acac})_3$ and $\text{TcO}(\text{OH})_2(\text{H}_2\text{O})_3$ compounds, also indicating the DFT optimised geometries for these molecules.

```
TITLE Tc(acac)30
EDGE K
S02 1
CONTROL 1 1 1 1 1 1
PRINT 5 0 0 1 1 3
EXCHANGE 3 5 0.8 0
AFOLP 1.3
EXAFS 15
RMAX 5
NLEG 6
XANES 12 0.07 2
```

```

POTENTIALS
  0  43 Tc
  1   8 O
  2   6 C1
5  3   6 C2
  4   6 C3
  5   1 H
  6   1 H

10 ATOMS
-0.0052 -0.0001 -0.0000 0 Tc 0.0000
 0.0167 -1.6941 1.1586 1 O 2.0524
 0.0015 1.6942 -1.1585 1 O 2.0525
 1.4505 0.8534 1.1688 1 O 2.0527
15 1.4579 -0.8404 -1.1692 1 O 2.0528
-1.4779 0.8236 1.1701 1 O 2.0524
-1.4706 -0.8370 -1.1699 1 O 2.0534
 0.7597 -2.7280 1.0103 2 C1 3.0079
 0.7348 2.7349 -1.0102 2 C1 3.0080
20 2.0085 -1.9883 -1.0208 2 C1 3.0083
-2.7391 -0.7318 -1.0200 2 C1 3.0083
-2.7455 0.7073 1.0202 2 C1 3.0084
 1.9908 2.0062 1.0205 2 C1 3.0084
-3.3850 -0.0151 0.0001 3 C2 3.3798
25 1.7126 -2.9109 -0.0047 3 C2 3.3799
 1.6863 2.9263 0.0047 3 C2 3.3801
 0.5434 -3.8097 2.0452 4 C3 4.3585
 0.5084 3.8147 -2.0449 4 C3 4.3587
30 3.0601 -2.3185 -2.0567 4 C3 4.3590
 3.0397 2.3456 2.0561 4 C3 4.3590
-3.5570 -1.4650 -2.0599 4 C3 4.3594
-3.5698 1.4332 2.0602 4 C3 4.3595
-4.4686 -0.0198 0.0000 5 H 4.4634
 2.2654 -3.8429 -0.0040 5 H 4.4635
35 2.2306 3.8633 0.0041 5 H 4.4637
-3.2612 -2.5200 -2.0801 5 H 4.6128
-3.2840 2.4910 2.0797 5 H 4.6132
 3.8275 -1.5360 -2.0602 5 H 4.6144
 3.8141 1.5702 2.0593 5 H 4.6145
40 -0.5482 4.1058 -2.0441 5 H 4.6186
-0.5105 -4.1104 2.0450 5 H 4.6186
 0.7317 3.4175 -3.0418 5 H 4.6342
 0.7636 -3.4104 3.0421 5 H 4.6342
 2.6025 -2.3245 -3.0527 5 H 4.6392
45 2.5824 2.3474 3.0523 5 H 4.6393
-3.3499 1.0224 3.0525 5 H 4.6422
-3.3415 -1.0517 -3.0521 5 H 4.6424
 1.1678 -4.6888 1.8673 6 H 5.1814
 1.1249 4.6993 -1.8670 6 H 5.1814
50 -4.6311 -1.3958 -1.8709 6 H 5.1814
-4.6433 1.3538 1.8717 6 H 5.1815
 3.5346 -3.2863 -1.8765 6 H 5.1818
 3.5054 3.3177 1.8759 6 H 5.1818

55 TITLE TcO(OH)2(H2O)3
EDGE K
S02 1
CONTROL 1 1 1 1 1 1
    
```

```

PRINT 5 0 0 1 1 3
60 EXCHANGE 3 9 0.8 0
AFOLP 1.3
EXAFS 15
RMAX 5
NLEG 4
65 XANES 12 0.07 2
POTENTIALS
  0  43 Tc
  1   8 O
  2   8 O
70  3   8 O
  4   1 H
  5   8 O
ATOMS
 0.0734 -0.1928 0.0147 0 Tc 0.0000
75 0.4034 -1.8779 -0.1816 1 O 1.7283
 1.2344 0.4991 1.4425 2 O 1.9660
-1.3223 0.2468 -1.4091 2 O 2.0417
-1.8763 -0.7049 0.8919 3 O 2.1984
 2.0277 0.3030 -0.8970 3 O 2.2128
80 -2.3479 -0.5446 0.0384 4 H 2.4468
 2.4140 0.5306 -0.0153 4 H 2.4500
-0.7631 2.1692 0.1818 5 O 2.5113
-1.2096 1.8878 -0.6533 4 H 2.5340
 0.8171 0.6142 2.3095 4 H 2.5437
85 -1.8067 -1.6744 0.9715 4 H 2.5779
 2.3725 -0.5828 -1.1166 4 H 2.5919
-0.9874 0.2180 -2.3175 4 H 2.5948
-0.0388 2.7605 -0.0760 4 H 2.9568
    
```

<sup>a</sup> *kasteelpark arenberg 23, B-3001 Leuven, Belgium. Fax: +32 16 32 1998; Tel: +32 16 32 1457; E-mail: eric.breynaert@biw.kuleuven.be*

[1] Frisch, M.J., Trucks, G.W., Schlegel, H.B., Scuseria, G.E., Robb, M.A., Cheeseman, J.R., Montgomery, J.A., Vreven, T., Kudin, K.N., Burant, J.C., Millam, J.M., Iyengar, S.S., Tomasi, J., Barone, V., Mennucci, B., Cossi, M., Scalmani, G., Rega, N., Petersson, G.A., Nakatsuji, H., Hada, M., Ehara, M., Toyota, K., Fukuda, R., Hasegawa, J., Ishida, M., Nakajima, T., Honda, Y., Kitao, O., Nakai, H., Klene, M., Li, X., Knox, J.E., Hratchian, H.P., Cross, J.B., Bakken, V., Adamo, C., Jaramillo, J., Gomperts, R., Stratmann, R.E., Yazyev, O., Austin, A.J., Cammi, R., Pomelli, C., Ochterski, J.W., Ayala, P.Y., Morokuma, K., Voth, G.A., Salvador, P., Dannenberg, J.J., Zakrzewski, V.G., Dapprich, S., Daniels, A.D., Strain, M.C., Farkas, O., Malick, D.K., Rabuck, A.D., Raghavachari, K., Foresman, J.B., Ortiz, J.V., Cui, Q., Baboul, A.G., Clifford, S., Cioslowski, J., Stefanov, B.B., Liu, G., Liashenko, A., Piskorz, P., Komaromi, I., Martin, R.L., Fox, D.J., Keith, T., Laham, A., Peng, C.Y., Nanayakkara, A., Challacombe, M., Gill, P.M.W., Johnson, B., Chen, W., Wong, M.W., Gonzalez, C., and Pople, J.A., *Gaussian 03, Revision D.02*. 2004, Gaussian 03, Revision D.02, Gaussian, Inc., Wallingford, CT.

- [2] George, G.N. and Pickering, I.J., *EXAFSPAK — A Suite of Computer Programs for Analysis of X-ray Absorption Spectra*. 1993: Menlo Park, CA.
- [3] Ravel, B. and Newville, M., *ATHENA and ARTEMIS: interactive graphical data analysis using IFEFFIT*. *Physica Scripta*, 2005. **T115**: p. 1007-1010.
- [4] Koningsberger, D.C., Mojet, B.L., van Dorssen, G.E., and Ramaker, D.E., *XAFS spectroscopy; fundamental principles and data analysis*. *Topics in Catalysis*, 2000. **10**(3-4): p. 143-155.
